# Supplementary material for: Co-Assembled Supramolecular Organohydrogels of Amphiphilic Zwitterion and Polyoxometalate with Controlled Microstructures
Source: MDPI journal article supplement (doi:10.3390/molecules29102286), 2024-05-12
Supplement: s1 [file s1]

*Supporting Information for*

# Co-assembled Supramolecular Organohydrogels of Amphiphilic Zwitterion and Polyoxometalate with Controlled Microstructures

Peilin Wei <sup>1,†</sup>, Yu Duan <sup>1,†</sup>, Chen Wang <sup>1</sup>, Panpan Sun <sup>2,\*</sup> and Na Sun <sup>1,\*</sup>

1 College of Pharmacy, Shandong Second Medical University, Weifang, Shandong,  
261053, China; 19510200661@163.com; miaoyintian@163.com;  
wangchchw@163.com

2 School of Bioscience and Technology, Shandong Second Medical University,  
Weifang, Shandong, 261053, China; sunpanpan@sdsu.edu.cn

† These authors contributed equally to this work.

\* Correspondence: sunpanpan@sdsu.edu.cn; sunna@sdsu.edu.cn

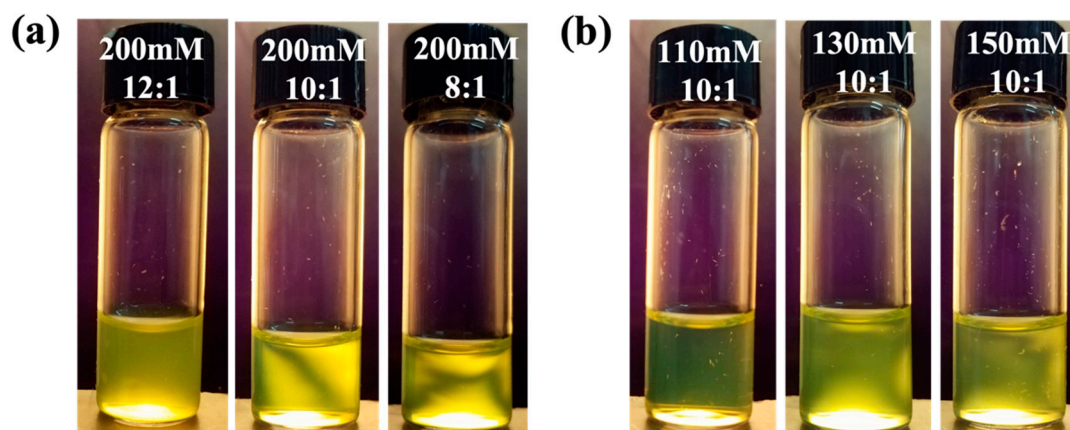

**Figure S1.** Optical photographs of organohydrogels observed with crossed polarizers: (a) samples with different  $(C8)_2MeAS/HPMo$  molar ratios and fixed  $(C8)_2MeAS$  concentration of 200 mM; (b) samples with various  $(C8)_2MeAS$  concentrations and the fixed  $(C8)_2MeAS/HPMo$  molar ratio of 10:1.

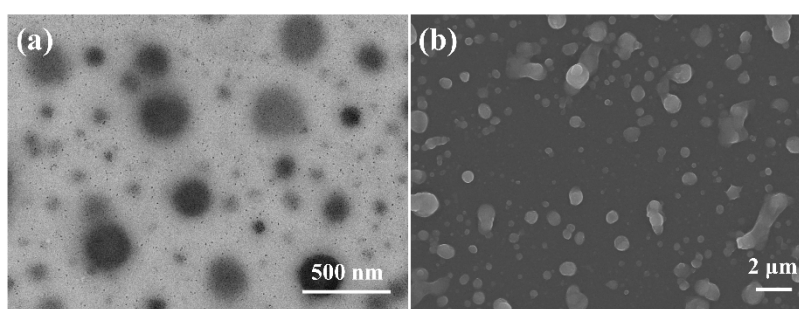

**Figure S2.** TEM (a) and SEM (b) images of the organohydrogel with  $(C8)_2MeAS/HPMo$  molar ratio of 5:1. The concentration of  $(C8)_2MeAS$  was fixed at 200 mM.

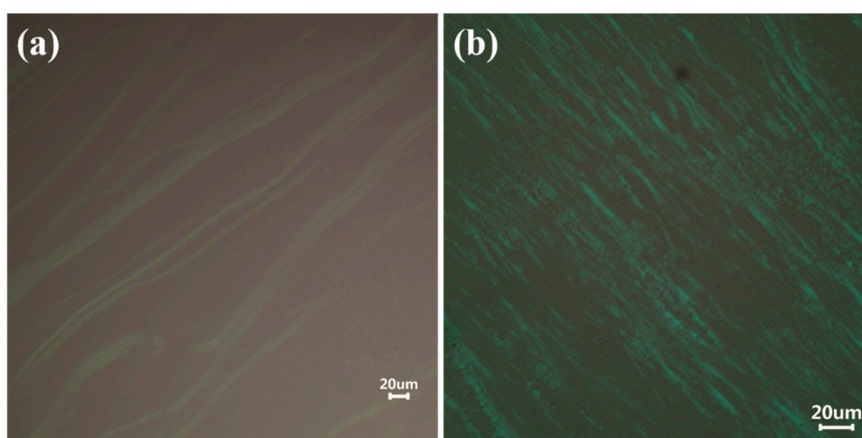

**Figure S3.** POM images of samples with different  $(C8)_2MeAS$  concentration: (a) 280 mM (b) 300 mM. The  $(C8)_2MeAS/HPMo$  molar ratio is fixed at 10:1.

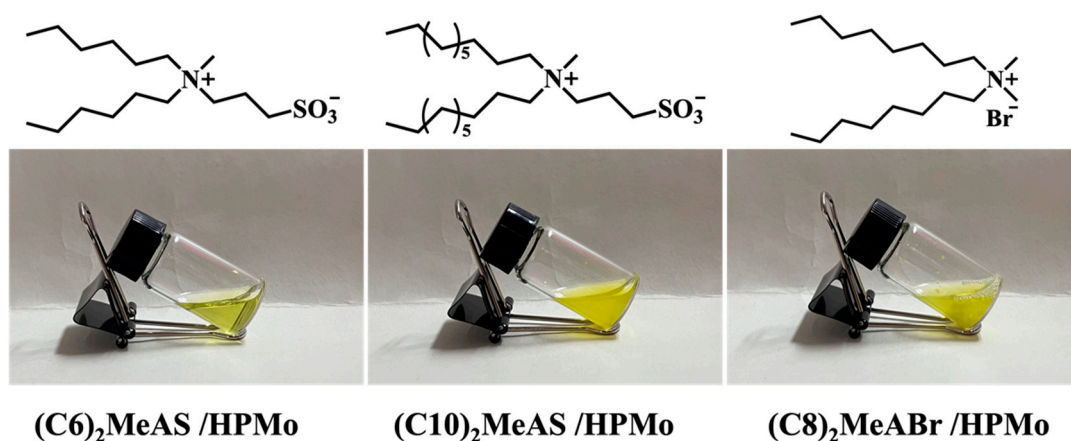

**Figure S4.** Photos of mixtures composed of different amphiphiles and HPMo. The molar ratio between amphiphiles and HPMo was 10:1, and the concentration of amphiphiles was fixed at 200 mM.

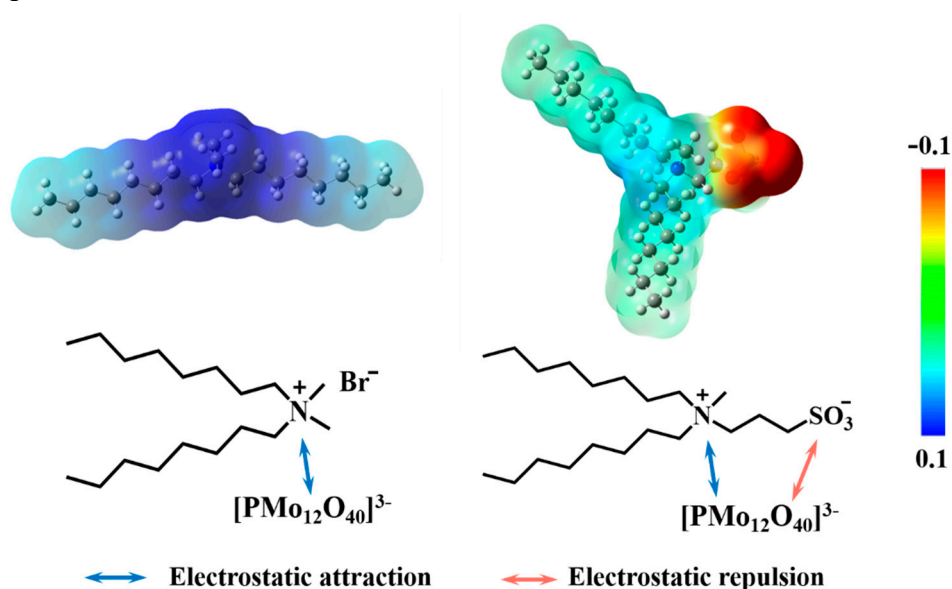

**Figure S5.** Schematic illustration of electrostatic interaction for  $(\text{C8})_2\text{MeABr}/\text{HPMo}$  and  $(\text{C8})_2\text{MeAS}/\text{HPMo}$  systems.

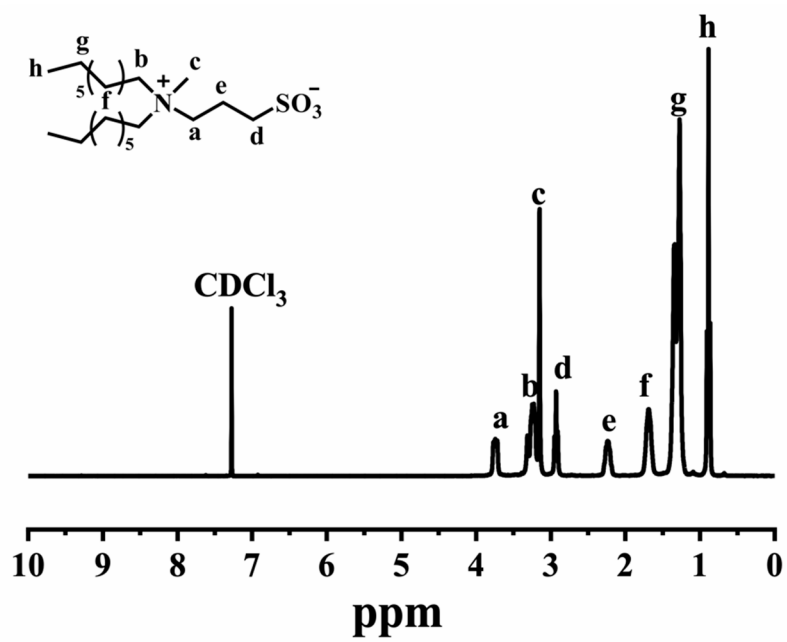

**Figure S6.** The  $^1\text{H}$  NMR spectrum of  $(\text{C8})_2\text{MeAS}$  in  $\text{CDCl}_3$ .
